# Supplementary material for: Advanced 19F-NMR studies shed new light on encapsulation of isosteric guests in the hexameric capsules of resorcin[4]arenes and pyrogallol[4]arenes
Source: Royal Society of Chemistry journal article supplement (doi:10.1039/d4qo00261j), 2024-01-01
Supplement: d4qo00261j1.pdf [file d4qo00261j1.pdf]

## Supporting Information

### Advanced $^{19}\text{F}$ -NMR Studies Shed New Light on Encapsulation of Isosteric Guests in the Hexameric Capsules of Resorcin[4]arenes and Pyrogallol[4]arenes

Sarit Slovak,<sup>a</sup> Tamar Salem,<sup>a</sup> Inbar Horin,<sup>a</sup> Liat Avram,<sup>b\*</sup> and Yoram Cohen,<sup>a\*</sup>

<sup>a</sup> School of Chemistry, The Sackler Faculty of Exact Sciences Tel Aviv University, Ramat Aviv, 6977801 Tel Aviv, Israel. <sup>b</sup> Department of Chemical Research Support, Weizmann Institute of Science, Rehovot, 7610001, Israel.

**Materials.** All starting materials, reagents, guest molecules and the deuterated solvents were purchased from Sigma-Aldrich and were used as received. Compounds **1** and **2** were prepared according to modifications of the previously published procedures.<sup>1,2</sup>

**General.** <sup>1</sup>H NMR and <sup>19</sup>F NMR spectra, diffusion NMR measurements and <sup>19</sup>F-GEST NMR measurements were performed on 11.7T Avance III Bruker NMR spectrometer.

**Diffusion NMR.** For the diffusion measurements, the samples were placed in 4mm NMR tubes that were then placed coaxially in 5mm NMR tubes, which act as a thermal insulating system and increase the accuracy and reproducibility of the diffusion measurements by reducing the chance of convections in the sample. This precaution is more important when diffusion NMR experiments are performed on non-viscous solvents with low boiling points and heat capacities. Diffusion NMR were performed with a z-gradient system capable of producing maximal gradient pulses of about 50 gauss cm<sup>-1</sup>. <sup>1</sup>H- and <sup>19</sup>F-diffusion NMR experiments were performed using the longitudinal eddy currents delays (LED) pulse sequence.<sup>3</sup> Sine-shaped pulse gradients, of 4ms duration, were incremented from 0.7 to 32.2 gauss cm<sup>-1</sup> in 10 steps, the pulse gradient separation was 50ms, and the *t<sub>e</sub>* was set to 5ms. The diffusion coefficients were extracted from:

$$\ln I/I_0 = -\gamma^2 \delta^2 G^2 (2/\pi)^2 (\Delta - \delta/4) D = -bD$$

where *I* and *I<sub>0</sub>* are the echo intensity, in the presence and absence of the gradient pulse, respectively,  $\gamma$  is the gyromagnetic ratio, *G* is the pulse gradient strength,  $2/\pi$  is a geometrical correction factor due to the sine shape of the pulse gradients used,  $\delta$  is the duration of the pulse gradient,  $\Delta$  is the time interval between the leading edges of the pulse gradient used, and *D* is the diffusion coefficient. The diffusion coefficients were extracted from the slope of the plot of  $\ln I/I_0$  versus the *b* value. All diffusion NMR data were acquired at 298K and were obtained in triplicate. The given values represent means  $\pm$  the standard deviation.

**<sup>19</sup>F-GEST.** <sup>19</sup>F-GEST experiments were performed on 11.7T NMR instrument at 470MHz. A pre-saturation pulse with varying intensity and of 2sec of duration was applied prior to the 90° pulse. The frequency of the pre-saturation pulse was swept from  $\Delta\omega = +3.2\text{ppm}$  to  $\Delta\omega = -3.2\text{ppm}$  in 128 steps relative to the frequency of the free guest

that was set to 0ppm. In addition, a reference  $^{19}\text{F}$ -NMR spectrum ( $S_0$ ) was collected with a pre-saturation pulse applied at  $\Delta\omega$  of +15ppm. For each frequency offset ( $S_{\Delta\omega}$ ), four scans were collected using a repetition time of 8sec, resulting in a collection time of 31sec per  $^{19}\text{F}$ -NMR spectrum. The total collection time of the entire GEST experiment was 70minutes. For  $k_{\text{out}}$  values estimation the z-spectra of the multi-B1 GEST experiments were fitted using the Bloch–McConnell equations, as recently described.<sup>4-8</sup> Simulations were performed on the z-spectra using custom-written scripts in MATLAB version 8.2.0.701 (The MathWorks, Natick, MA). The code for data fitting can be found at <http://www.cest-sources.org/doku.php?id=start> and can be found in the publication by Zaiss and Bachert.<sup>4-8</sup>

**Table S1:** Integration ratios of the signals of **1** and **2** (4.3-5ppm) vs. the signals of encapsulated **3** and **4**, in  $\text{C}_6\text{D}_6$  and  $\text{CDCl}_3$  solutions of 30mM of **1** and **2** and 10mM of **3** and **4**.

| Sample                               | Normalized integration ratios of host signals at 4-5ppm vs signals of encapsulated guests <sup>a</sup> |        |        |           |
|--------------------------------------|--------------------------------------------------------------------------------------------------------|--------|--------|-----------|
|                                      | #1                                                                                                     | #2     | #3     | Average   |
| <b>1/3</b> in $\text{C}_6\text{D}_6$ | 1:0.42                                                                                                 | 1:0.44 | 1:0.49 | 0.45±0.04 |
| <b>1/3</b> in $\text{CDCl}_3$        | 1:0.63                                                                                                 | 1:0.64 | 1:0.64 | 0.63±0.01 |
| <b>1/4</b> in $\text{C}_6\text{D}_6$ | 1:0.28                                                                                                 | 1:0.27 | 1:0.30 | 0.28±0.02 |
| <b>1/4</b> in $\text{CDCl}_3$        | NA                                                                                                     | NA     | NA     | NA        |
| <b>2/3</b> in $\text{C}_6\text{D}_6$ | 1:0.17                                                                                                 | 1:0.18 | 1:0.19 | 0.18±0.01 |
| <b>2/3</b> in $\text{CDCl}_3$        | 1:0.12                                                                                                 | 1:0.12 | 1:0.13 | 0.12±0.01 |
| <b>2/4</b> in $\text{C}_6\text{D}_6$ | 1:0.40                                                                                                 | 1:0.41 | 1:0.40 | 0.40±0.01 |
| <b>2/4</b> in $\text{CDCl}_3$        | NA                                                                                                     | NA     | NA     | NA        |

<sup>a</sup> Taking into account that **4** has 3 hydrogens less than **3**.

For **1** in the  $\text{C}_6\text{D}_6$  solutions, the encapsulation preference of **4** over **3** is  $0.28/0.45 = 0.62$ , while for **2**, in the same solvent, it is  $0.40/0.18 = 2.22$  resulting in a preference ratio of more than 3 for the two capsules.

**Table S2.**  $^1\text{H}$  Diffusion coefficients for representative peaks of **1**, **2**, **3** and **4** (500MHz, 298K) in the  $\text{CDCl}_3$  solutions of 30mM of **1** or **2** and 10mM of **3** and **4**.

| Sample                           | peak (ppm)                     | $^1\text{H}$ Diffusion coefficients<br>[ $\times 10^{-5} \text{ cm}^2 \text{ s}^{-1}$ ] |                             |
|----------------------------------|--------------------------------|-----------------------------------------------------------------------------------------|-----------------------------|
|                                  |                                | No $\text{CD}_3\text{OD}$                                                               | With $\text{CD}_3\text{OD}$ |
| <b>1/3</b> in<br>$\text{CDCl}_3$ | -0.06 (encapsulated <b>3</b> ) | $0.24 \pm 0.01$                                                                         | NA                          |
|                                  | 1.9 (free <b>3</b> )           | $1.00 \pm 0.01$                                                                         | $1.10 \pm 0.02^a$           |
|                                  | 4.3 ( <b>1</b> )               | $0.25 \pm 0.01$                                                                         | $0.41 \pm 0.01^a$           |
|                                  | 7.28 ( $\text{CHCl}_3$ )       | $1.96 \pm 0.05$                                                                         | $2.30 \pm 0.02^a$           |
| <b>1/4</b> in<br>$\text{CDCl}_3$ | 2.0 (free <b>4</b> )           | $0.95 \pm 0.01$                                                                         |                             |
|                                  | 4.3 ( <b>1</b> )               | $0.25 \pm 0.01$                                                                         |                             |
|                                  | 7.28 ( $\text{CHCl}_3$ )       | $1.90 \pm 0.02$                                                                         |                             |
| <b>2/3</b> in<br>$\text{CDCl}_3$ | 0.37 (encapsulated <b>3</b> )  | $0.23 \pm 0.01$                                                                         | NA                          |
|                                  | 1.9 (free <b>3</b> )           | $1.06 \pm 0.01$                                                                         | $0.94 \pm 0.01^b$           |
|                                  | 4.3 ( <b>2</b> )               | $0.23 \pm 0.01$                                                                         | $0.37 \pm 0.01^b$           |
|                                  | 7.28 ( $\text{CHCl}_3$ )       | $2.34 \pm 0.01$                                                                         | $1.91 \pm 0.17^b$           |
| <b>2/4</b> in<br>$\text{CDCl}_3$ | 2.0 (free <b>4</b> )           | $1.01 \pm 0.01$                                                                         |                             |
|                                  | 4.4 ( <b>2</b> )               | $0.23 \pm 0.01$                                                                         |                             |
|                                  | 7.28 ( $\text{CHCl}_3$ )       | $2.29 \pm 0.02$                                                                         |                             |

<sup>a</sup> For disruption of hexameric capsules of **1/3** in  $\text{CDCl}_3$  45 $\mu\text{l}$  of  $\text{CD}_3\text{OD}$  were added. <sup>b</sup> For disruption of hexameric capsule of **2/3** in  $\text{CDCl}_3$  150 $\mu\text{l}$  of  $\text{CD}_3\text{OD}$  were added.

**Table S3.**  $^{19}\text{F}$  Diffusion coefficients of **4** (470MHz, 298K) in the  $\text{C}_6\text{D}_6$  and  $\text{CDCl}_3$  solutions of 30mM of **1** or **2** and 10mM of **4**.

| Sample                                  | Peak (ppm)                      | $^{19}\text{F}$ Diffusion coefficients<br>[ $\times 10^{-5} \text{ cm}^2 \text{ s}^{-1}$ ] |
|-----------------------------------------|---------------------------------|--------------------------------------------------------------------------------------------|
| <b>1/4</b> in<br>$\text{C}_6\text{D}_6$ | -143 (free <b>4</b> )           | $0.96 \pm 0.01$                                                                            |
| <b>2/4</b> in<br>$\text{C}_6\text{D}_6$ | -145.7 (encapsulated <b>4</b> ) | $0.21 \pm 0.01$                                                                            |
|                                         | -143 (free <b>4</b> )           | $0.98 \pm 0.01$                                                                            |
| <b>1/4</b> in<br>$\text{CDCl}_3$        | -143 (free <b>4</b> )           | $0.93 \pm 0.01^a$                                                                          |
| <b>2/4</b> in<br>$\text{CDCl}_3$        | -143 (free <b>4</b> )           | $1.03 \pm 0.01$                                                                            |

<sup>a</sup> Partial overlap with the small signal of the encapsulated guest<sup>4</sup>.

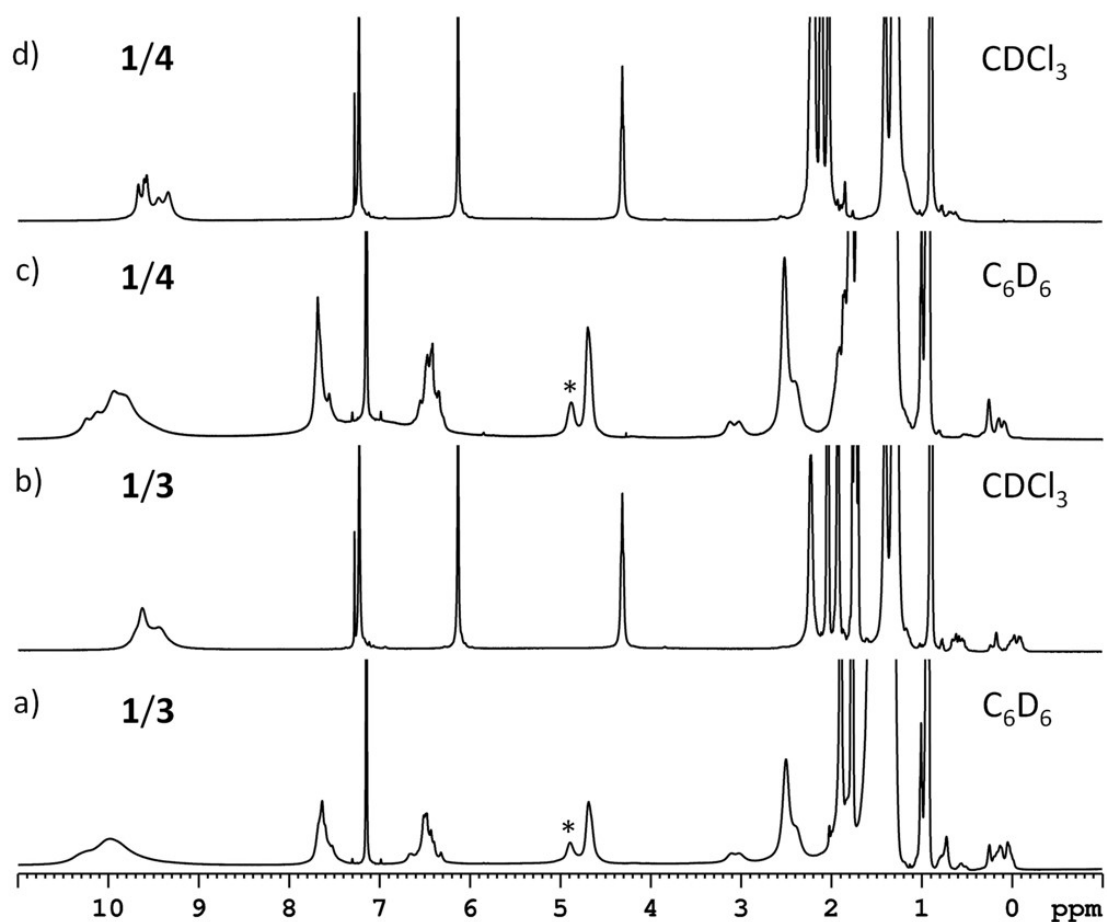

**Figure S1.** <sup>1</sup>H-NMR spectra (500MHz, 298K) of the solutions of 30mM of **1** and 100mM of **3** (a, b) and **4** (c, d) in C<sub>6</sub>D<sub>6</sub> (a, c) and CDCl<sub>3</sub> (b, d). The \* symbols represent signals of the higher aggregates of **1** in C<sub>6</sub>D<sub>6</sub>.

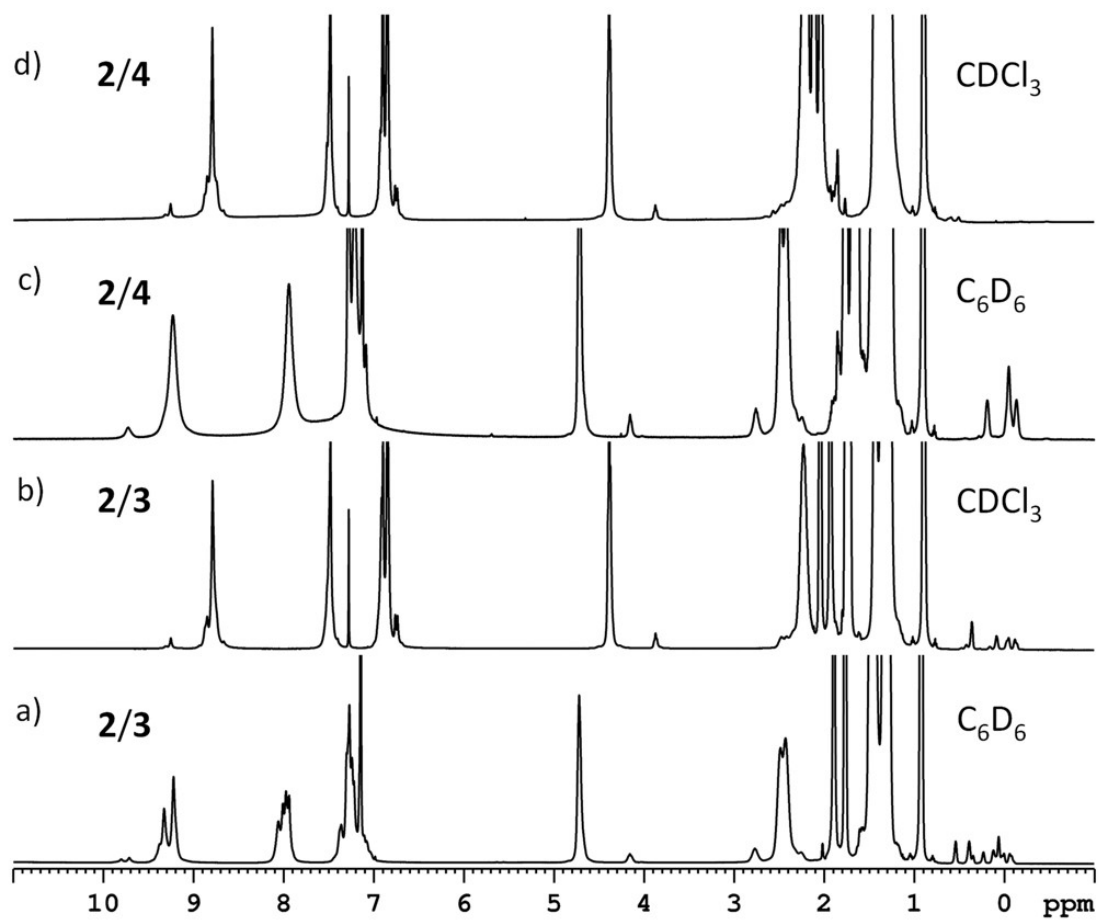

**Figure S2.** <sup>1</sup>H-NMR spectra (500MHz, 298K) of the solutions of 30mM of **2** and 100mM of **3** (a, b) and **4** (c, d) in C<sub>6</sub>D<sub>6</sub> (a, c) and CDCl<sub>3</sub> (b, d).

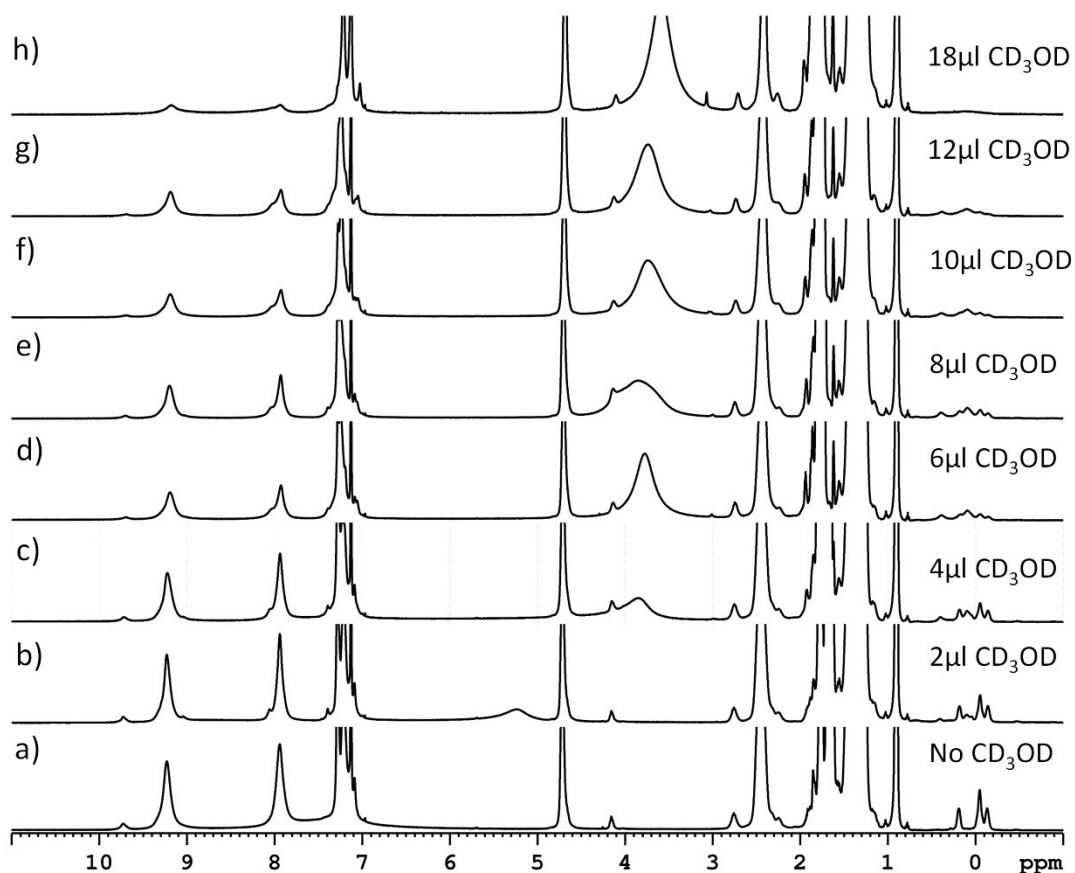

**Figure S3.**  $^1\text{H}$ -NMR spectra (500MHz, 298K) of the  $\text{C}_6\text{D}_6$  solution of 30mM of **2** and 100mM of **4** a) before and after addition of b) 2 $\mu\text{l}$ , c) 4 $\mu\text{l}$ , d) 6 $\mu\text{l}$ , e) 8 $\mu\text{l}$ , f) 10 $\mu\text{l}$ , g) 12 $\mu\text{l}$  and h) 18 $\mu\text{l}$   $\text{CD}_3\text{OD}$ .

**Table S4.**  $^1\text{H}$  Diffusion coefficients for representative peaks of **2**, and **4** (500MHz, 298K) in the  $\text{C}_6\text{D}_6$  solution of 30mM of **2** and 100mM of **4**.

| Sample                                  | Peak (ppm)                      | $^1\text{H}$ Diffusion coefficients<br>[ $\times 10^{-5} \text{ cm}^2 \text{ s}^{-1}$ ] |                                                |                                                 |                                                 |
|-----------------------------------------|---------------------------------|-----------------------------------------------------------------------------------------|------------------------------------------------|-------------------------------------------------|-------------------------------------------------|
|                                         |                                 | No $\text{CD}_3\text{OD}$                                                               | With 8 $\mu\text{l}$<br>$\text{CD}_3\text{OD}$ | With 12 $\mu\text{l}$<br>$\text{CD}_3\text{OD}$ | With 18 $\mu\text{l}$<br>$\text{CD}_3\text{OD}$ |
| <b>2/4</b> in<br>$\text{C}_6\text{D}_6$ | -0.13 (encapsulated <b>4</b> )  | $0.20 \pm 0.01$                                                                         | NA                                             | NA                                              | NA                                              |
|                                         | 1.7 (free <b>4</b> )            | $0.80 \pm 0.01$                                                                         | $0.91 \pm 0.01$                                | $0.91 \pm 0.01$                                 | $0.96 \pm 0.01$                                 |
|                                         | 4.7 ( <b>2</b> )                | $0.19 \pm 0.01$                                                                         | $0.19 \pm 0.01$                                | $0.18 \pm 0.01$                                 | $0.22 \pm 0.01$                                 |
|                                         | 7.15 ( $\text{C}_6\text{H}_6$ ) | $1.77 \pm 0.01$                                                                         | $1.97 \pm 0.01$                                | $1.94 \pm 0.01$                                 | $2.13 \pm 0.02$                                 |

**Table S5.**  $^{19}\text{F}$  Diffusion coefficients of **4** (470MHz, 298K) in the  $\text{C}_6\text{D}_6$  solution of 30mM of **2** and 100mM of **4** before and after addition of methanol.

| Sample                                  | Peak (ppm)                      | $^{19}\text{F}$ Diffusion coefficients<br>[ $\times 10^{-5} \text{ cm}^2 \text{ s}^{-1}$ ] |                                                |                                                 |                                                 |
|-----------------------------------------|---------------------------------|--------------------------------------------------------------------------------------------|------------------------------------------------|-------------------------------------------------|-------------------------------------------------|
|                                         |                                 | No $\text{CD}_3\text{OD}$                                                                  | With 8 $\mu\text{l}$<br>$\text{CD}_3\text{OD}$ | With 12 $\mu\text{l}$<br>$\text{CD}_3\text{OD}$ | With 18 $\mu\text{l}$<br>$\text{CD}_3\text{OD}$ |
| <b>2/4</b> in<br>$\text{C}_6\text{D}_6$ | -145.7 (encapsulated <b>4</b> ) | $0.18 \pm 0.01$                                                                            | NA                                             | NA                                              | NA                                              |
|                                         | -143.0 (free <b>4</b> )         | $0.81 \pm 0.01$                                                                            | $0.92 \pm 0.01$                                | $0.91 \pm 0.01$                                 | $0.96 \pm 0.01$                                 |

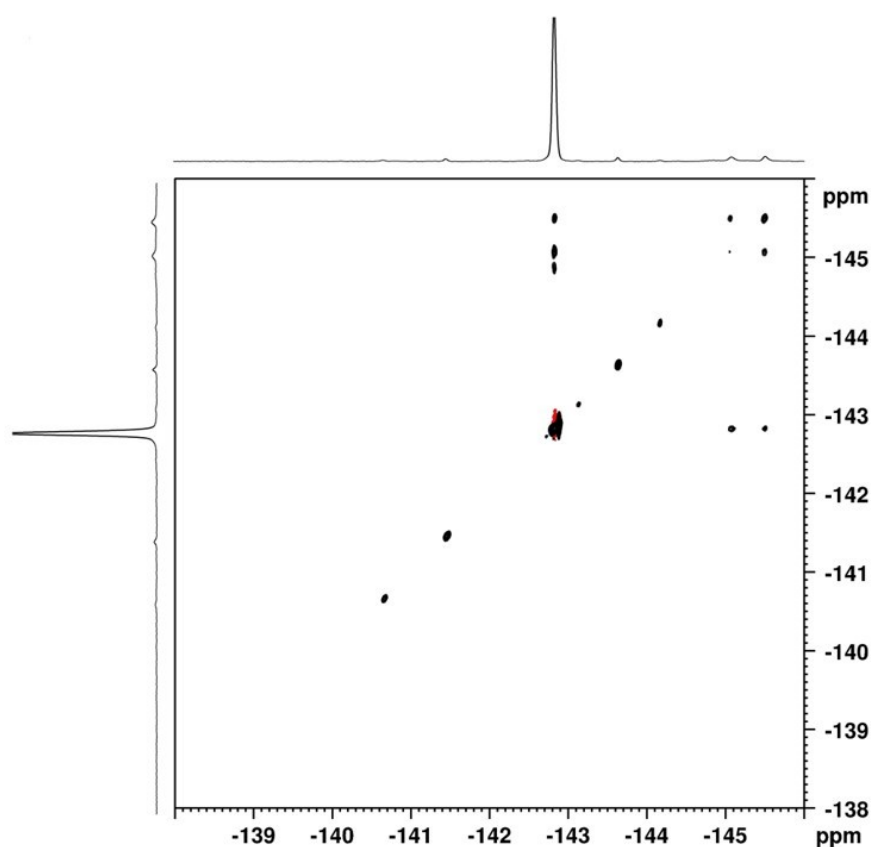

**Figure S4.**  $^{19}\text{F}$  2D NOESY experiment performed on the  $\text{C}_6\text{D}_6$  solution of 30mM of **2** and 10mM of **4** (470MHz, 298K) after addition of 8 $\mu\text{l}$  of  $\text{CD}_3\text{OD}$ . The spectra was collected 18hours after sample preparation.

#### 4. References

- (1) Avram, L.; Cohen, Y. *J. Am. Chem. Soc.* **2002**, *124*, 15148-15149.
- (2) Avram, L.; Cohen, Y. *J. Am. Chem. Soc.*, **2004**, *126*, 11556-11563.
- (3) Gibbs, S. J.; Johnson, C. S. Jr., *J. Magn. Reson.*, **1991**, *93*, 395-402.
- (4) M. Zaiss, P. Bachert, *NMR Biomed.*, **2013**, *26*, 507-518.



- (5) M. Zaiss, Z. Zu, J. Xu, P. Schuenke, D. F. Gochberg, J. C. Gore, M. E. Ladd, P. Bachert, *NMR Biomed.*, **2015**, 28, 217-230.
- (6) M. Zaiss, G. Angelovski, E. Demetriou, M. T. McMahon, X. Golay, K. Scheffler, *Magn. Reson. Med.*, **2018**, 79, 1708-1721.
- (7) L. Avram, V. Havel, R. Shusterman-Krush, M. A. Iron, M. Zaiss, V. Sindelar, A. Bar-Shir, *Chem. Eur. J.*, **2019**, 25, 1687-1690.
- (8) R. Shusterman-Krush, L. Grimm, L. Avram, F. Biedermann, A. Bar-Shir, *Chem. Sci.*, **2021**, 12, 865-871.
